# Supplementary material for: Unexplored analytics of some novel 3d–4f heterometallic Schiff base complexes
Source: Royal Society of Chemistry journal article supplement (doi:10.1039/c4ra04531a), 2014-08-18
Supplement: c4ra04531a1.pdf [file c4ra04531a1.pdf]

## Unexplored Analytics of Some Novel 3d-4f Heterometallic Schiff Base Complexes

Partha Pratim Chakrabarty<sup>a,b</sup>, Sandip Saha<sup>a,\*</sup>, Kamalika Sen<sup>b,\*</sup>, Atish Dipankar Jana<sup>c</sup>,  
Debarati Dey<sup>d</sup>, Dieter Schollmeyer<sup>e</sup>, Santiago García-Granda<sup>f</sup>,

<sup>a</sup> Department of Chemistry, Acharya Prafulla Chandra College, New Barrackpur, Kolkata-700131, India

<sup>b</sup> Department of Chemistry, University of Calcutta, 92 APC Road, Kolkata 700009, India

<sup>c</sup> Department of Physics, Behala College, Parnasree, Kolkata 700 060, India

<sup>d</sup> Department of Chemistry and Environment, Heritage Institute of Technology, Chowbaga Road, Anandapur, Kolkata 700107, India

<sup>e</sup> Institut für Organische Chemie, Universität Mainz, Duesbergweg 10-14 55099 Mainz, Germany

<sup>f</sup> Departamento de Química Física y Analítica, Universidad de Oviedo, C/Julián Clavería 8, 33006 Oviedo, Spain

**Table S1:** Bond Distance and Bond Angle table (Angstrom, Degree)

|               | Bond Distances |                 |           |
|---------------|----------------|-----------------|-----------|
| Pr1 -O2       | 2.424(7)       | Pr1 -O2I        | 2.633(13) |
| Pr1 -O1       | 2.428(7)       | Pr1 -O4         | 2.648(9)  |
| Pr1 -O2W      | 2.492(19)      | Pr1 -O3         | 2.673(7)  |
| Pr1 -O1W      | 2.526(13)      |                 |           |
| Pr1 -O6I      | 2.558(9)       | Cu1 -N1         | 1.894(11) |
| Pr1 -O3I      | 2.573(12)      | Cu1 -O1         | 1.902(8)  |
| Pr1 -O10I     | 2.58(3)        | Cu1 -N2         | 1.924(10) |
| Pr1 -O12 I    | 2.59(5)        | Cu1 -O2         | 1.926(8)  |
| Pr1 -O7I      | 2.611(9)       |                 |           |
|               | Bond Angles    |                 |           |
| O2 - Pr1 -O1  | 63.6(3)        | O6I- Pr1- O10I  | 127.1(7)  |
| O2 -Pr1 -O2W  | 128.3(5)       | O3I -Pr1- O10I  | 149.1(7)  |
| O1 -Pr1 -O2W  | 122.2(6)       | O2 -Pr1 -O12I   | 119.9(11) |
| O2 -Pr1 -O1W  | 71.9(4)        | O1 -Pr1- O12I   | 126.1(12) |
| O1 -Pr1 -O1W  | 69.0(4)        | O6I -Pr1- O12I  | 87.3(11)  |
| O2W -Pr1- O1W | 65.9(5)        | O3I -Pr1- O12I  | 126.5(12) |
| O2- Pr1- O6I  | 148.9(4)       | O3I -Pr1 -O12I  | 126.5(12) |
| O1- Pr1- O6I  | 114.3(3)       | O10I- Pr1- O12I | 47.3(14)  |
| O2W -Pr1 -O6I | 80.6(5)        | O2- Pr1- O7I    | 127.6(3)  |
| O1W- Pr1- O6I | 138.4(4)       | O1- Pr1 -O7I    | 160.4(3)  |
| O2- Pr1 -O3I  | 75.9(4)        | O2W -Pr1 -O7I   | 66.2(5)   |
| O1 -Pr1 -O3I  | 107.0(4)       | O1W -Pr1 -O7I   | 127.6(5)  |
| O2W- Pr1 -O3I | 130.7(6)       | O6I -Pr1 -O7I   | 47.1(3)   |
| O1W -Pr1 -O3I | 145.6(4)       | O3I -Pr1 -O7I   | 65.8(4)   |
| O6I -Pr1 -O3I | 75.5(4)        | O10I -Pr1 -O7I  | 111.7(7)  |
| O2 -Pr1 -O10I | 84.0(7)        | O12I -Pr1 -O7I  | 65.6(12)  |
| O1 -Pr1 -O10I | 83.9(7)        | O2 -Pr1 -O2I    | 81.1(4)   |
| O2W- Pr1-O2I  | 150.6(6)       | O1- Pr1 -O2I    | 67.9(3)   |
| O1W -Pr1- O2I | 135.9(4)       | O6I- Pr-1 O2I   | 70.5(4)   |

|                |           |                |          |
|----------------|-----------|----------------|----------|
| O3I- Pr1 -O2I  | 47.0(4)   | O10I -Pr1 -O2I | 151.7(7) |
| O12I -Pr1- O2I | 157.7(12) | O2W- Pr1 -O4   | 76.3(6)  |
| O1W- Pr1 -O4   | 78.5(4)   | O6I -Pr1- O4   | 69.9(3)  |
| O2W -Pr1 -O3   | 84.9(6)   | O1W- Pr1- O3   | 81.7(4)  |
| N1 -Cu1- O1    | 96.0(4)   | N1 -Cu1- N2    | 85.5(5)  |
| O1 -Cu1- N2    | 174.4(4)  | N1 -Cu1 -O2    | 173.8(5) |
| O1 -Cu1-O2     | 83.8(3)   | N2- Cu1- O2    | 94.2(4)  |
| N1 -Cu1- Pr1   | 137.1(3)  | O1 -Cu1- Pr1   | 41.9(2)  |
| N2 -Cu1 -Pr1   | 135.6(3)  | O2 -Cu1 -Pr1   | 42.0(2)  |
| N1I- O2I -Pr1  | 97.5(10)  | N1I -O3I -Pr1  | 97.9(11) |

Table S2: Bond Distance and Bond Angle table (Angstrom, Degree)

|              | Bond Distances |               |           |
|--------------|----------------|---------------|-----------|
| Nd1 -O1      | 2.411(6)       | Nd1 -O11      | 2.554(8)  |
| Nd1 -O2      | 2.420(6)       | Nd1 -O12      | 2.471(9)  |
| Nd1 -O3      | 2.666(6)       | Nd1 -O14      | 2.533(9)  |
| Nd1 -O4      | 2.632(7)       | Cu1 -O1       | 1.912(7)  |
| Nd1 -O6      | 2.511(9)       | Cu1 -O2       | 1.913(6)  |
| Nd1 -O8      | 2.532(9)       | Cu1 -O5       | 2.346(11) |
| Nd1 -O9      | 2.592(8)       | Cu1 -N1       | 1.897(9)  |
| Cu1 -N2      | 1.913(10)      |               |           |
|              | Bond Angles    |               |           |
| O1 -Nd1 -O2  | 63.0(2)        | O4 -Nd1 -O12  | 84.0(3)   |
| O1 -Nd1 -O3  | 122.1(2)       | O4 -Nd1 -O14  | 76.6(2)   |
| O1 -Nd1 -O4  | 60.2(2)        | O6 -Nd1 -O8   | 48.5(3)   |
| O1 -Nd1 -O6  | 75.6(3)        | O6 -Nd1 -O9   | 67.1(3)   |
| O1 -Nd1 -O8  | 93.3(3)        | O6 -Nd1 -O11  | 82.6(3)   |
| O1 -Nd1 -O9  | 118.6(2)       | O6 -Nd1 -O12  | 137.0(3)  |
| O1 -Nd1 -O11 | 158.2(3)       | O6 -Nd1 -O14  | 153.8(3)  |
| O1 -Nd1 -O12 | 127.9(3)       | O8 -Nd1 -O9   | 96.2(3)   |
| O1 -Nd1 -O14 | 83.3(3)        | O8 -Nd1 -O11  | 73.2(3)   |
| O2 -Nd1 -O3  | 60.5(2)        | O8 -Nd1 -O12  | 138.6(3)  |
| O2 -Nd1 -O4  | 120.9(2)       | O8 -Nd1 -O14  | 150.0(3)  |
| O2 -Nd1 -O6  | 101.4(3)       | O9 -Nd1 -O11  | 48.7(3)   |
| O2 -Nd1 -O8  | 70.0(3)        | O9 -Nd1 -O12  | 69.9(3)   |
| O2 -Nd1 -O9  | 166.2(3)       | O9 -Nd1 -O14  | 111.6(3)  |
| O2 -Nd1 -O11 | 124.5(3)       | O11 -Nd1 -O12 | 68.6(3)   |
| O2 -Nd1 -O12 | 121.0(3)       | O11 -Nd1 -O14 | 117.1(3)  |
| O2 -Nd1 -O14 | 82.1(3)        | O12 -Nd1 -O14 | 50.4(3)   |
| O3 -Nd1 -O4  | 153.5(2)       | O1 -Cu1 -O2   | 82.6(3)   |
| O3 -Nd1 -O6  | 126.9(3)       | O1 -Cu1 -O5   | 97.4(4)   |
| O3 -Nd1 -O8  | 79.2(3)        | O1 -Cu1 -N1   | 96.3(3)   |
| O3 -Nd1 -O9  | 119.4(2)       | O1 -Cu1 -N2   | 172.8(4)  |
| O3 -Nd1 -O11 | 73.1(2)        | O2 -Cu1 -O5   | 95.9(4)   |
| O3 -Nd1 -O12 | 75.1(3)        | O2 -Cu1 -N1   | 170.8(4)  |
| O3 -Nd1 -O14 | 77.6(3)        | O2 -Cu1 -N2   | 95.6(3)   |
| O4 -Nd1 -O6  | 79.6(3)        | O5 -Cu1 -N1   | 93.3(4)   |
| O4 -Nd1 -O8  | 127.1(3)       | O5 -Cu1 -N2   | 89.7(4)   |

|              |          |              |           |
|--------------|----------|--------------|-----------|
| O4 -Nd1 -O9  | 66.2(2)  | N1 -Cu1 -N2  | 84.4(4)   |
| O4 -Nd1 -O11 | 114.3(2) | Nd1 -O1 -Cu1 | 107.0(3)  |
| Nd1 -O1 -C8  | 128.3(5) | Cu1 -O5 -C22 | 126.1(10) |
| Cu1 -O1 -C8  | 124.1(6) | Nd1 -O6 -N3  | 98.6(7)   |
| Nd1 -O2 -Cu1 | 106.6(3) | Nd1 -O8 -N3  | 98.3(7)   |
| Nd1 -O2 -C19 | 129.0(6) | Nd1 -O9 -N4  | 96.1(6)   |
| Cu1 -O2 -C19 | 124.5(6) | Nd1 -O11 -N4 | 98.9(6)   |
| Nd1 -O3 -C18 | 119.0(5) | Nd1 -O12 -N5 | 97.8(7)   |
| Nd1 -O3 -C20 | 124.2(6) | Nd1 -O14 -N5 | 94.7(7)   |
| C18 -O3 -C20 | 116.7(7) | Cu1 -N1 -C9  | 124.1(8)  |
| Nd1 -O4 -C2  | 124.6(6) | Cu1 -N1 -C11 | 110.4(8)  |
| Nd1 -O4 -C3  | 117.3(6) | C9 -N1 -C11  | 125.2(10) |
| Cu1 -N2 -C13 | 124.1(8) | Cu1 -N2 -C12 | 114.2(8)  |

**Table S3:** Bond Distance and Bond Angle table (Angstrom, Degree)

|              | Bond Distances |               |           |
|--------------|----------------|---------------|-----------|
| Sm1 -O1      | 2.653(9)       | Sm1 -O11      | 2.465(18) |
| Sm1 -O2      | 2.373(10)      | Sm1 -O13      | 2.515(15) |
| Sm1 -O3      | 2.405(10)      | Cu1 -O1W      | 2.427(19) |
| Sm1 -O4      | 2.635(10)      | Cu1 -O2       | 1.901(10) |
| Sm1 -O5      | 2.459(13)      | Cu1 -O3       | 1.893(11) |
| Sm1 -O6      | 2.514(14)      | Cu1 -N1       | 1.930(15) |
| Sm1 -O8      | 2.523(13)      | Cu1 -N2       | 1.903(14) |
| Sm1 -O10     | 2.566(13)      |               |           |
|              | Bond Angles    |               |           |
| O1 -Sm1 -O2  | 61.0(3)        | O4 -Sm1 -O11  | 84.5(5)   |
| O1 -Sm1 -O3  | 122.2(3)       | O4 -Sm1 -O13  | 131.0(4)  |
| O1 -Sm1 -O4  | 155.3(3)       | O5 -Sm1 -O6   | 51.7(4)   |
| O1 -Sm1 -O5  | 77.3(4)        | O5 -Sm1 -O8   | 82.2(5)   |
| O1 -Sm1 -O6  | 80.4(4)        | O5 -Sm1 -O10  | 67.3(5)   |
| O1 -Sm1 -O8  | 120.3(4)       | O5 -Sm1 -O11  | 152.5(6)  |
| O1 -Sm1 -O10 | 72.2(3)        | O5 -Sm1 -O13  | 133.2(5)  |
| O1 -Sm1 -O11 | 120.0(5)       | O6 -Sm1 -O8   | 125.4(5)  |
| O1 -Sm1 -O13 | 73.4(4)        | O6 -Sm1 -O10  | 117.0(5)  |
| O2 -Sm1 -O3  | 63.4(3)        | O6 -Sm1 -O11  | 145.7(6)  |
| O2 -Sm1 -O4  | 122.7(3)       | O6 -Sm1 -O13  | 149.6(5)  |
| O2 -Sm1 -O5  | 120.1(4)       | O8 -Sm1 -O10  | 48.2(4)   |
| O2 -Sm1 -O6  | 79.0(4)        | O8 -Sm1 -O11  | 70.7(6)   |
| O2 -Sm1 -O8  | 155.4(4)       | O8 -Sm1 -O13  | 82.1(5)   |
| O2 -Sm1 -O10 | 127.2(4)       | O10 -Sm1 -O11 | 96.3(6)   |
| O2 -Sm1 -O11 | 87.4(5)        | O10 -Sm1 -O13 | 69.4(6)   |
| O2 -Sm1 -O13 | 74.9(5)        | O11 -Sm1 -O13 | 48.5(6)   |
| O3 -Sm1 -O4  | 60.4(3)        | O1W -Cu1 -O2  | 90.7(6)   |
| O3 -Sm1 -O5  | 120.2(4)       | O1W -Cu1 -O3  | 94.9(6)   |
| O3 -Sm1 -O6  | 74.9(4)        | O1W -Cu1 -N1  | 93.0(7)   |
| O3 -Sm1 -O8  | 116.7(4)       | O1W -Cu1 -N2  | 98.3(7)   |

|              |           |              |           |
|--------------|-----------|--------------|-----------|
| O3 -Sm1 -O10 | 164.0(4)  | O2 -Cu1 -O3  | 82.9(4)   |
| O3 -Sm1 -O11 | 70.9(5)   | O2 -Cu1 -N1  | 94.5(5)   |
| O3 -Sm1 -O13 | 106.2(5)  | O2 -Cu1 -N2  | 171.0(6)  |
| O4 -Sm1 -O5  | 81.1(4)   | O3 -Cu1 -N1  | 171.7(6)  |
| O4 -Sm1 -O6  | 76.9(4)   | O3 -Cu1 -N2  | 95.8(5)   |
| O4 -Sm1 -O8  | 67.6(4)   | N1 -Cu1 -N2  | 85.6(6)   |
| O4 -Sm1 -O10 | 110.1(4)  | Sm1 -O1 -C2  | 122.7(8)  |
| Sm1 -O1 -C3  | 117.9(8)  | Sm1 -O5 -N3  | 99.9(11)  |
| Sm1 -O2 -Cu1 | 107.2(4)  | Sm1 -O6 -N3  | 95.7(11)  |
| Sm1 -O2 -C8  | 128.0(9)  | Sm1 -O8 -N4  | 99.4(11)  |
| Cu1 -O2 -C8  | 124.5(9)  | Sm1 -O10 -N4 | 97.0(10)  |
| Sm1 -O3 -Cu1 | 106.2(5)  | Sm1 -O11 -N5 | 100.2(13) |
| Sm1 -O3 -C28 | 128.2(9)  | Sm1 -O13 -N5 | 95.7(12)  |
| Cu1 -O3 -C28 | 125.4(10) | Cu1 -N1 -C9  | 124.2(13) |
| Sm1 -O4 -C19 | 121.6(9)  | Cu1 -N1 -C10 | 112.4(13) |
| Sm1 -O4 -C27 | 119.9(9)  | C9 -N1 -C10  | 123.2(17) |
| Cu1 -N2 -C12 | 124.1(12) | Cu1 -N2 -C11 | 108.5(13) |
